# Supplementary material for: Alternative synthesis of the anti-baldness compound RU58841
Source: Royal Society of Chemistry journal article supplement (doi:10.1039/c4ra00332b), 2014-01-01
Supplement: c4ra00332b1.pdf [file c4ra00332b1.pdf]

Electronic supplementary information for  
Alternative synthesis of the anti-baldness compound RU58841

Published in RSC Advances

by

Matthew J. Leonard, Anthony R. Lingham, Julie O. Niere, Neale R. C. Jackson,

Peter G. McKay and Helmut M. Hügel

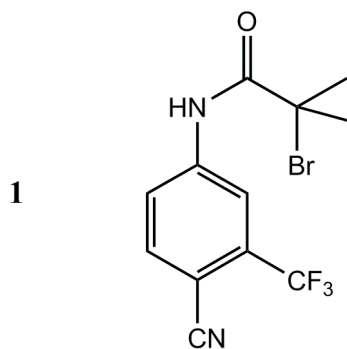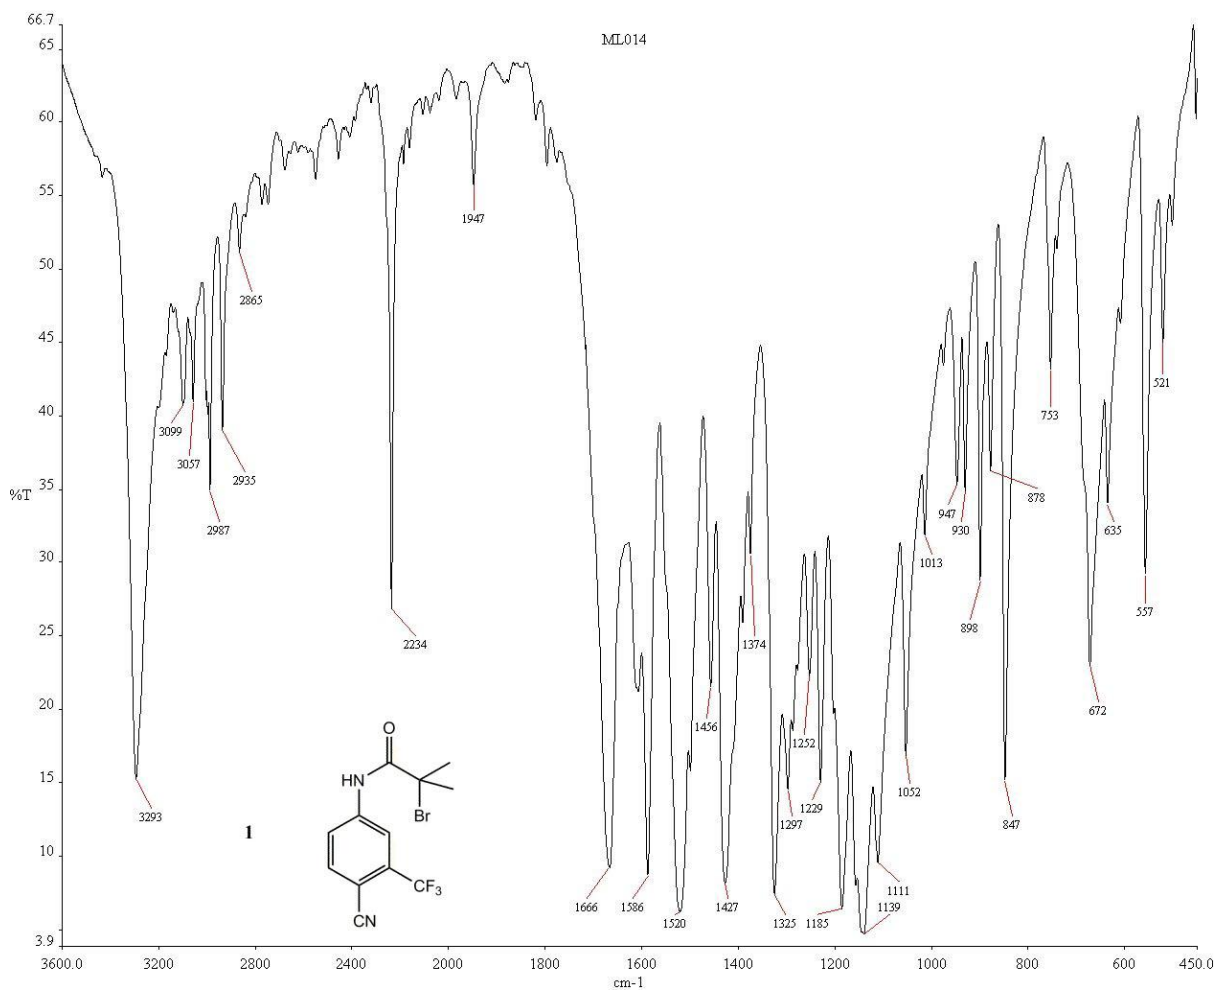

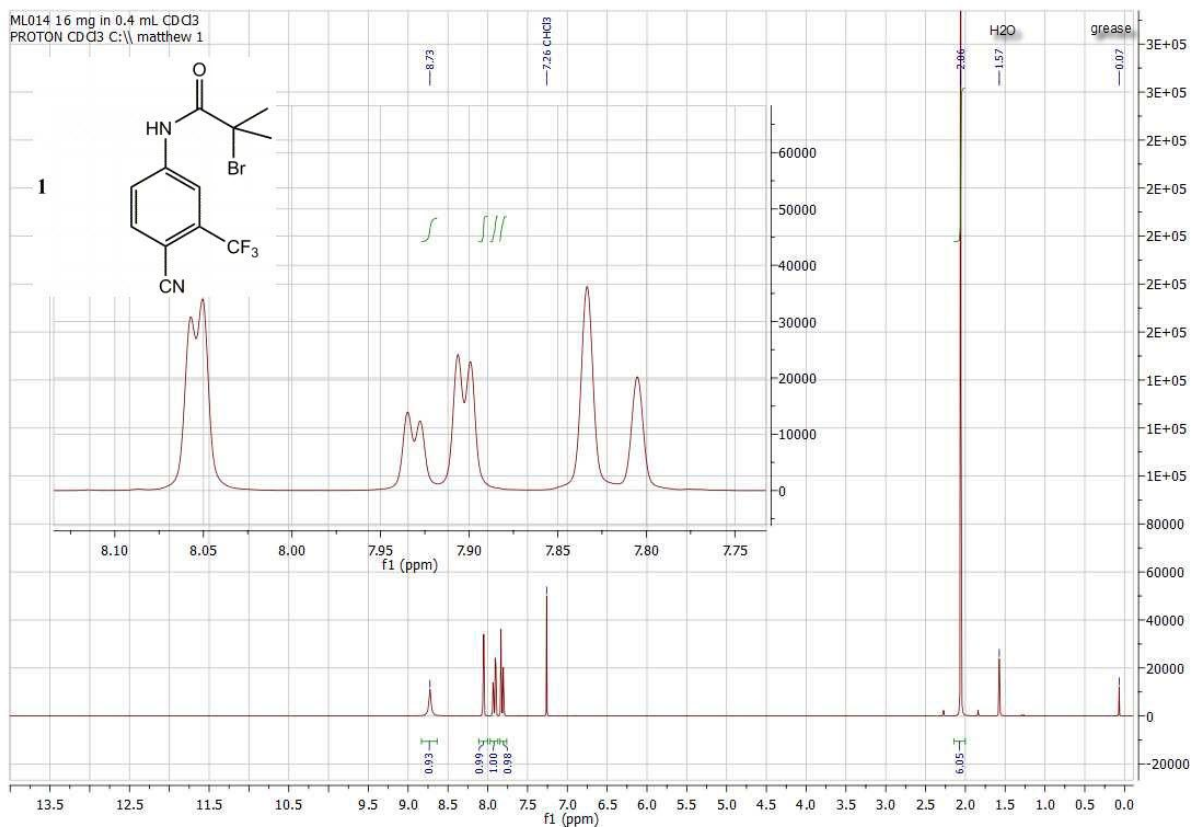

20 mg in 0.4 mL CDCl<sub>3</sub>, 300 MHz, 256 scans

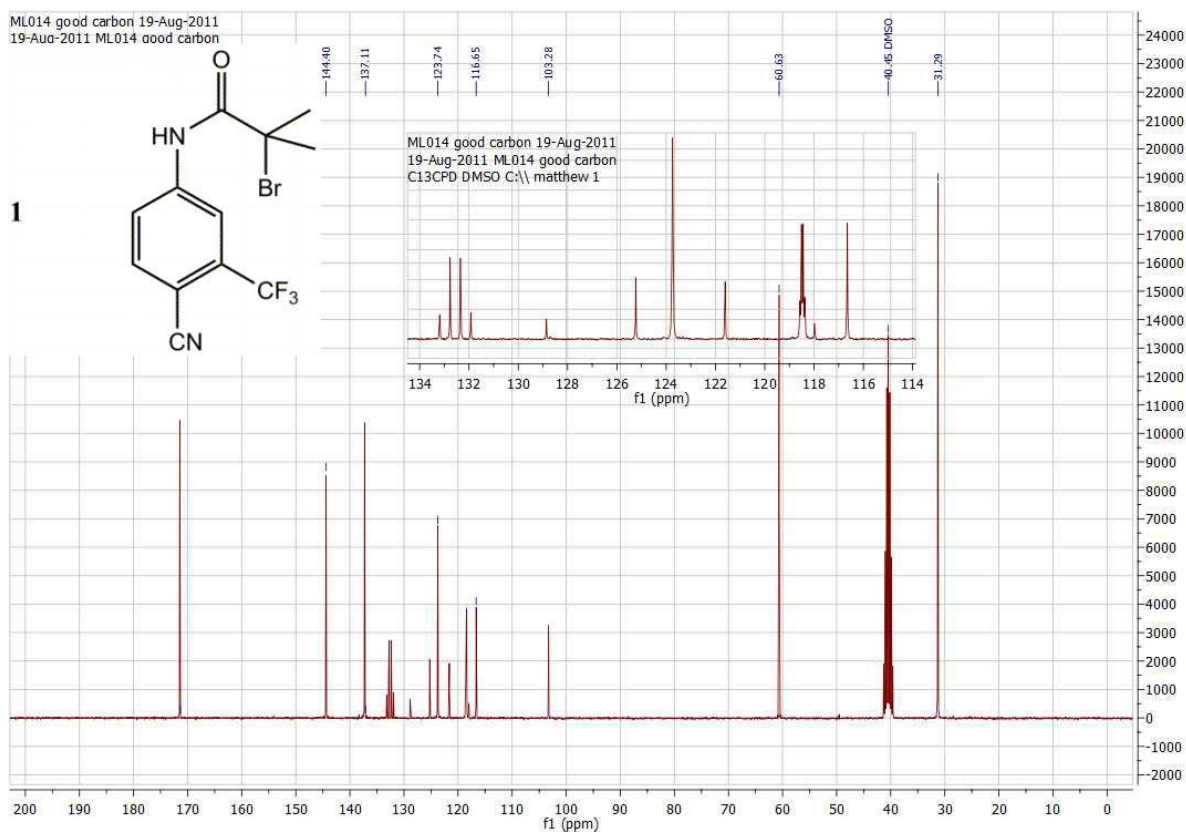

40 mg in 0.4 mL d<sub>6</sub>-DMSO, 75 MHz, 2048 scans

2

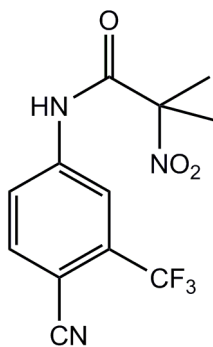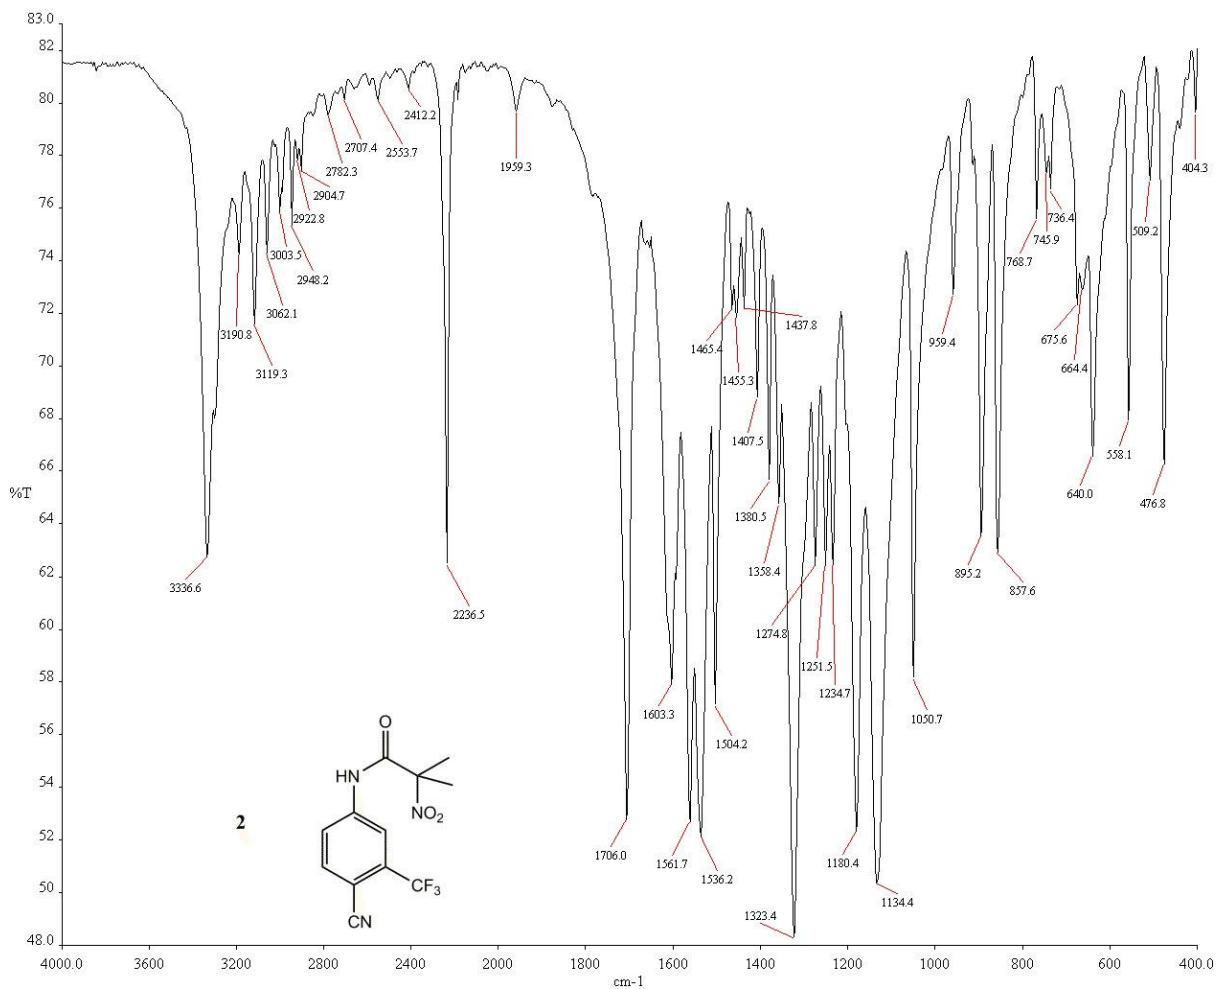

2

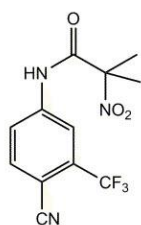

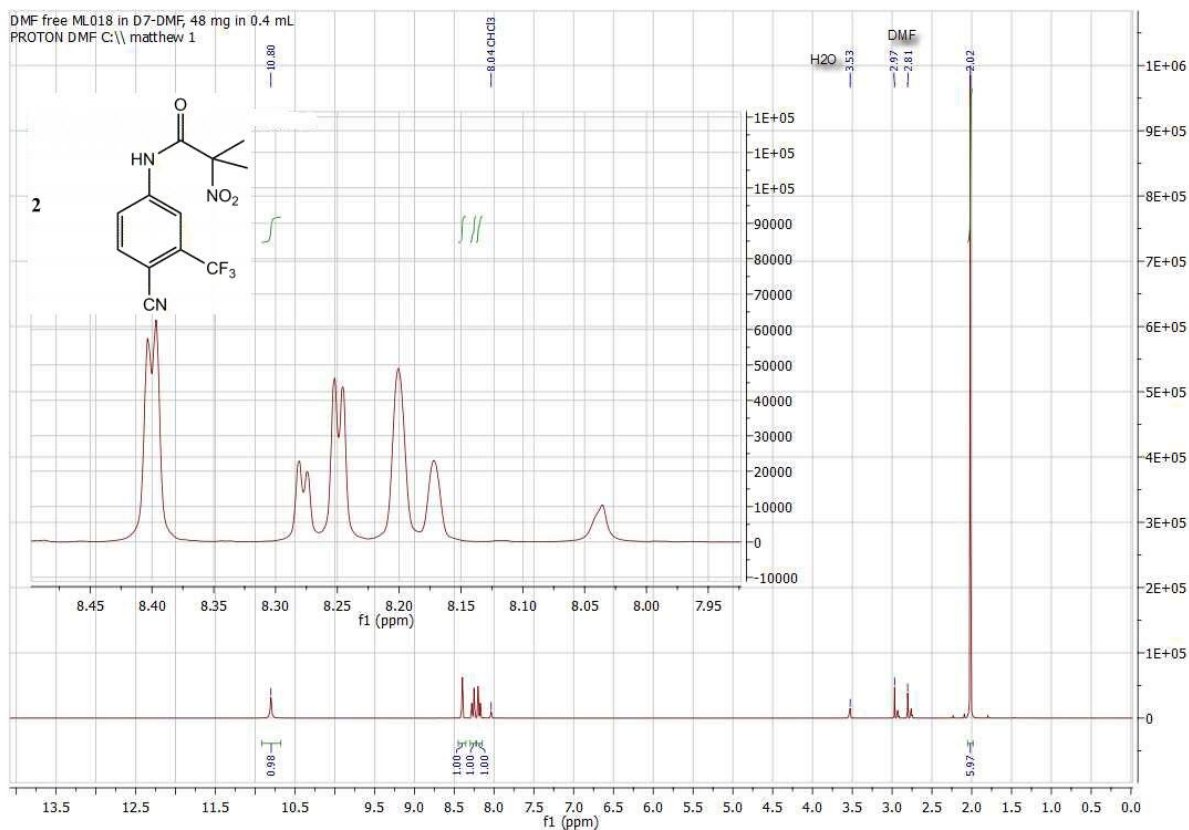

48 mg in 0.4 mL d7-DMF, 300 MHz, 256 scans

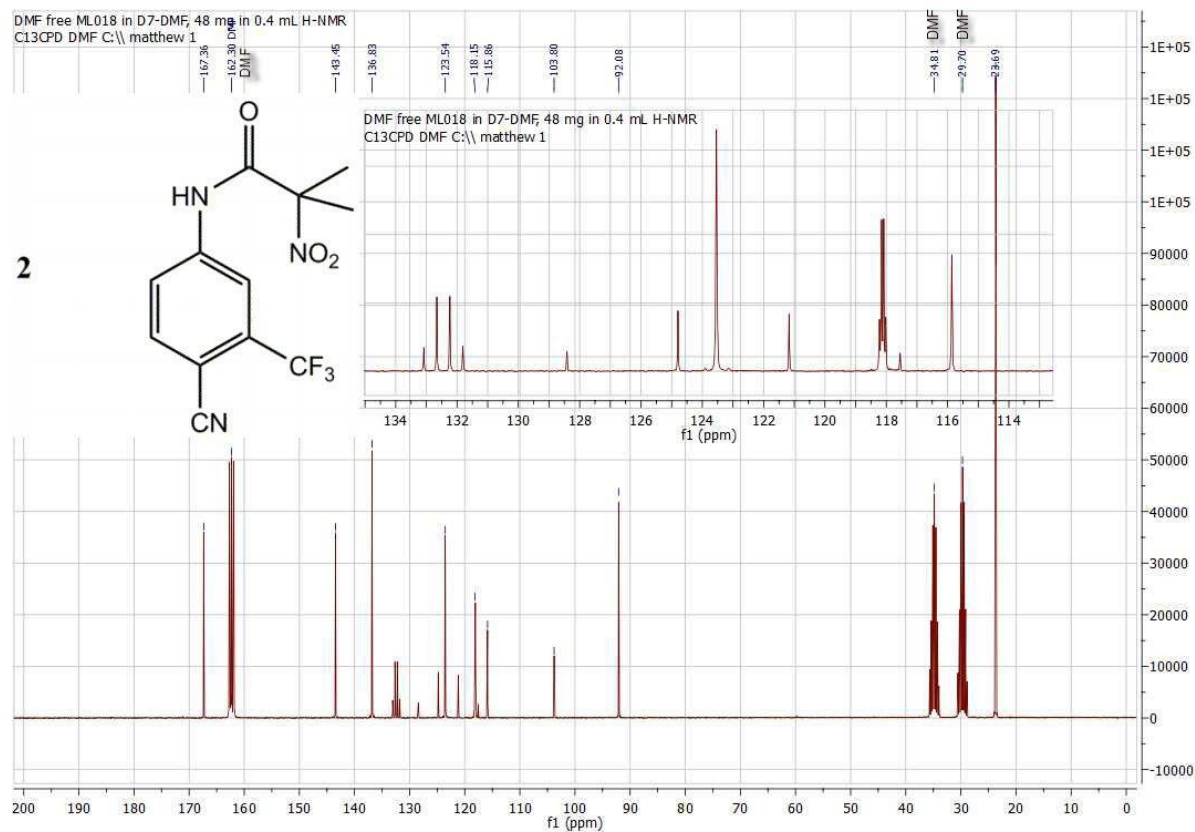

48 mg in 0.4 mL d7-DMF, 75 MHz, 20000 scans

3

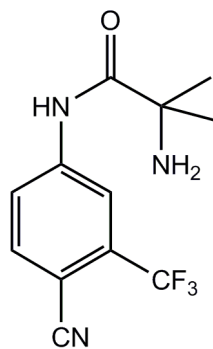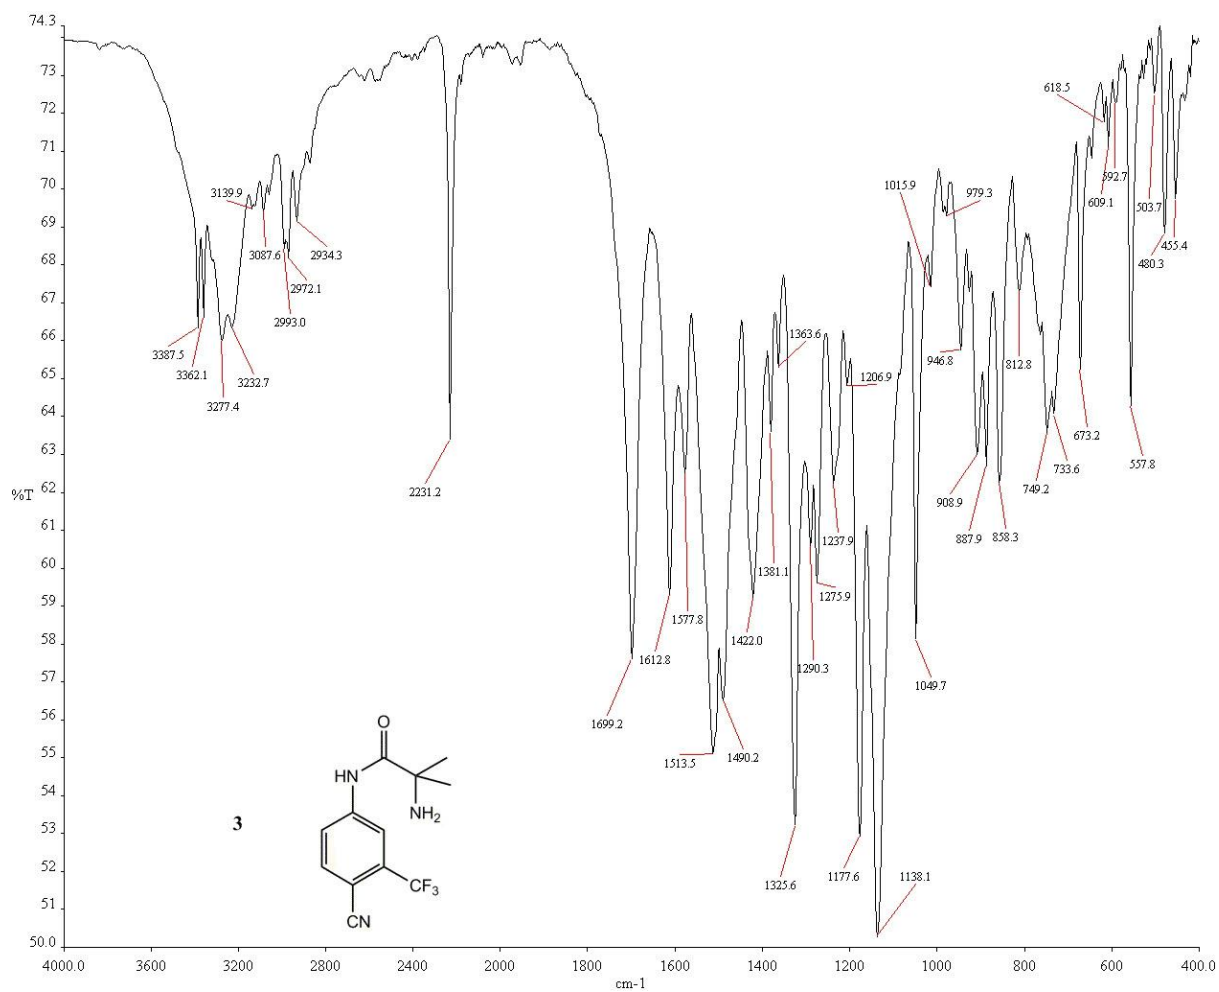

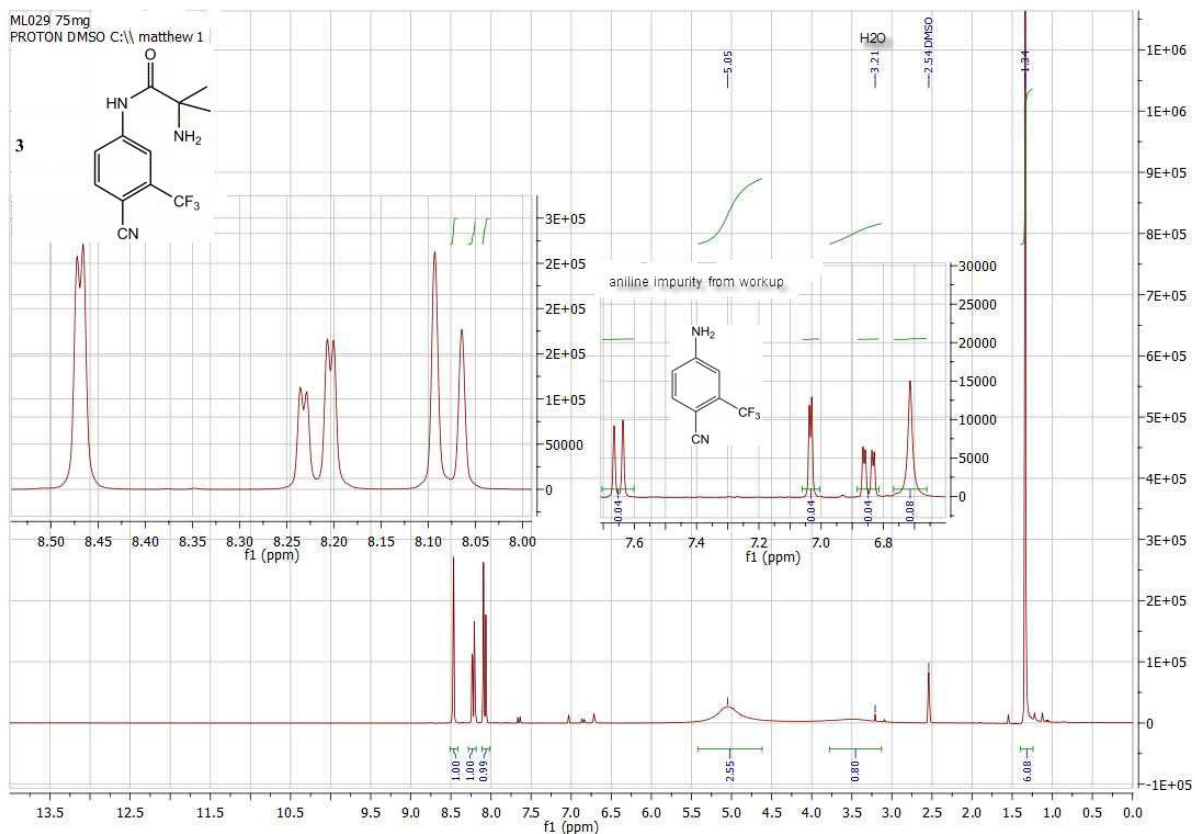

75 mg in 0.5 mL d<sub>6</sub>-DMSO, 300 MHz, 1024 scans. The small amount of aniline impurity is due to the acid/base workup of this compound.

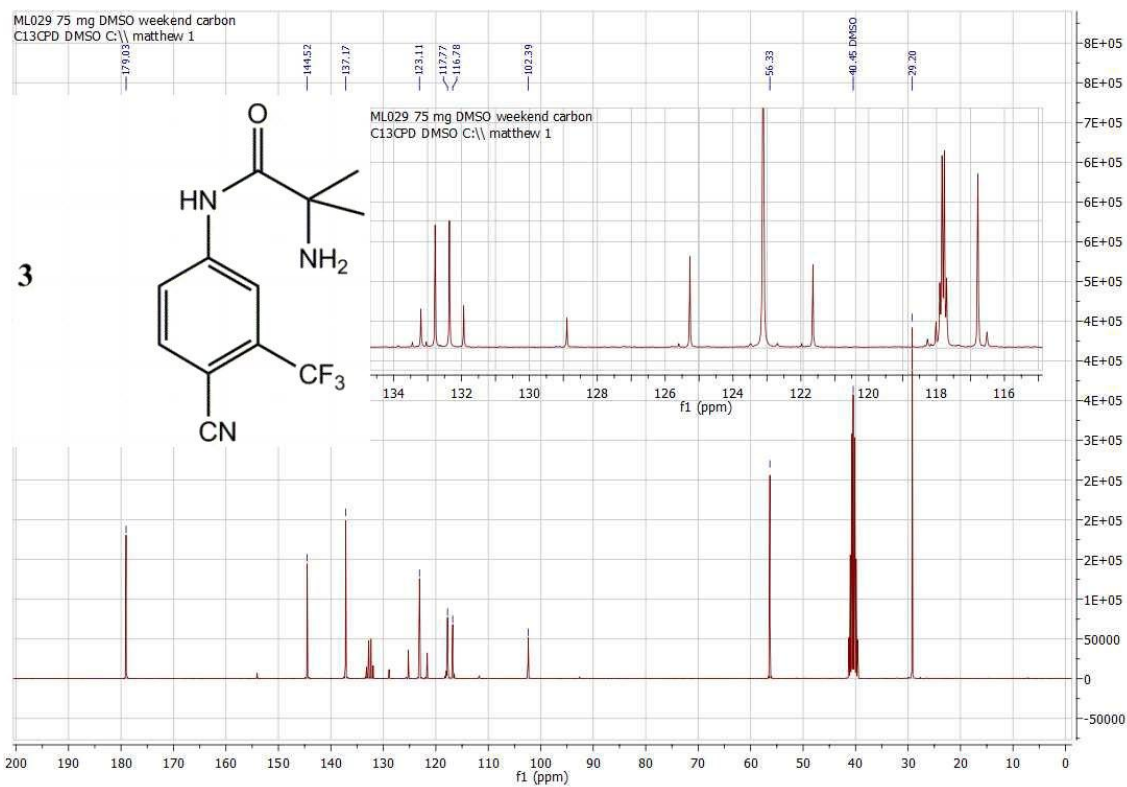

C-NMR was run using the same tube as H-NMR from above, 75 MHz, 55000 scans

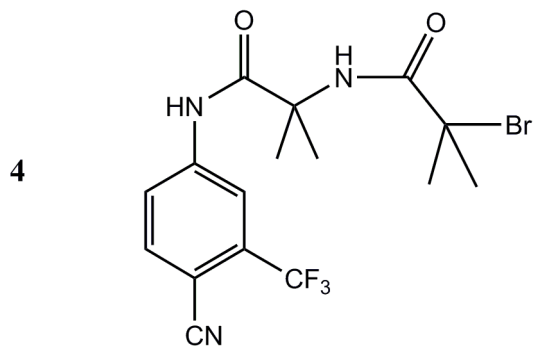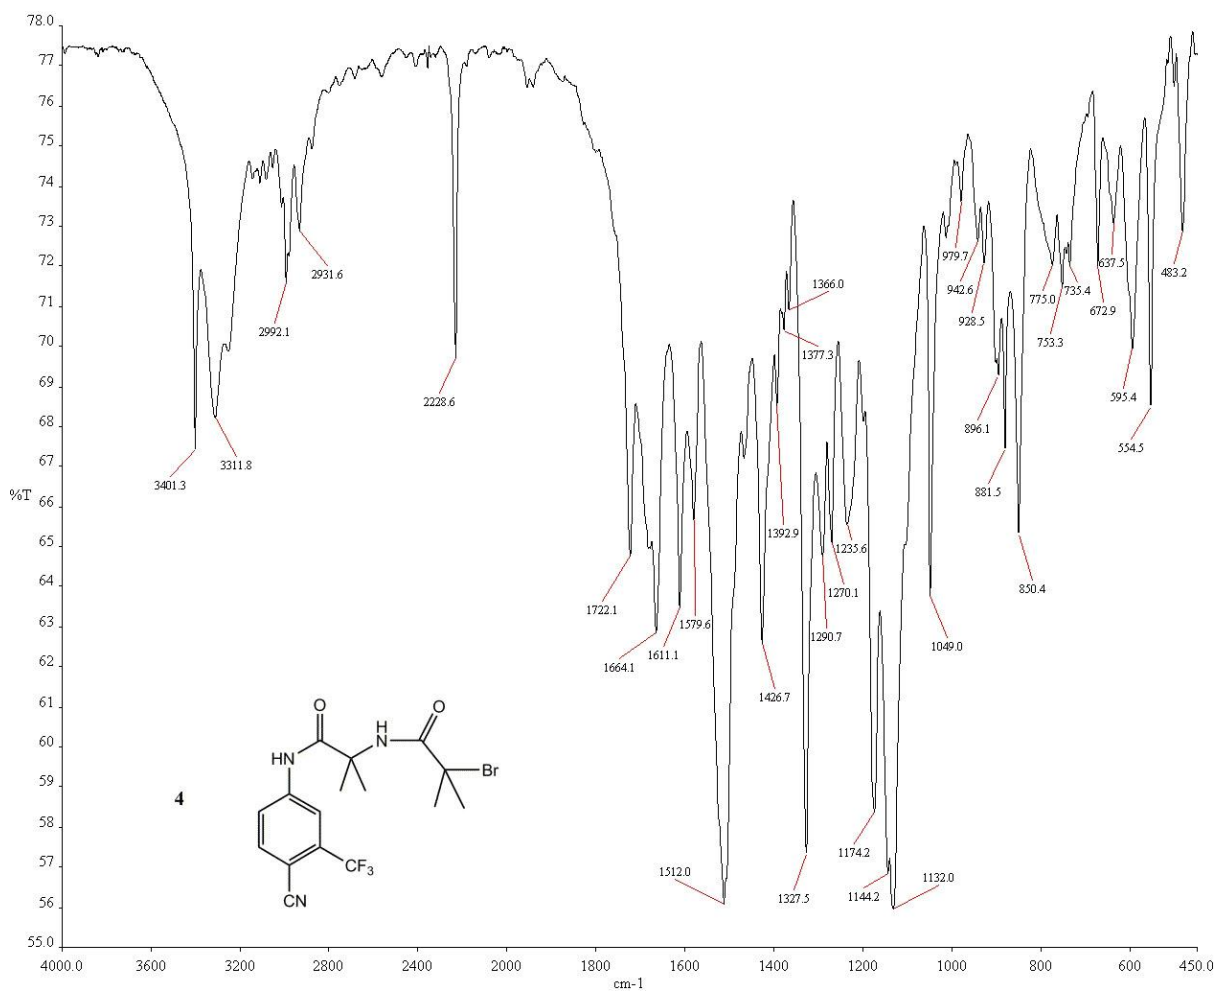

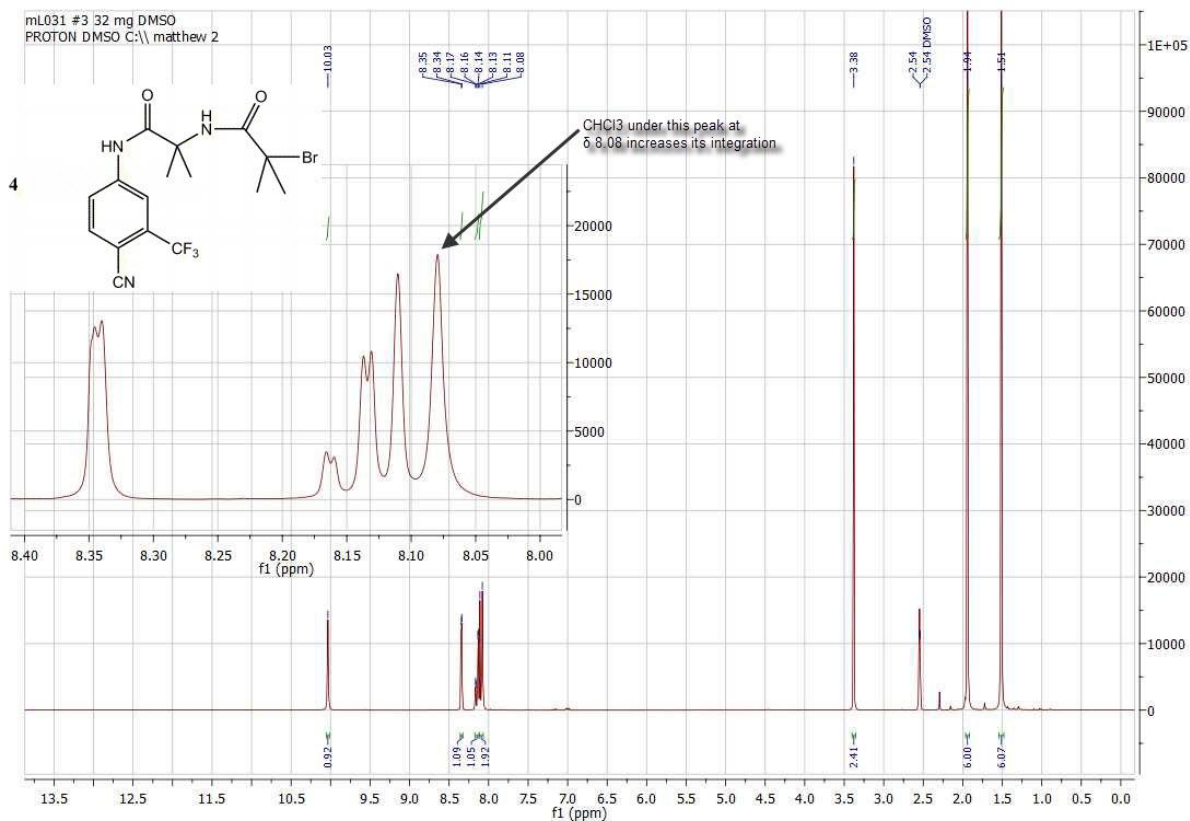

32 mg in 0.4 mL d6-DMSO, 300 MHz, 128 scans

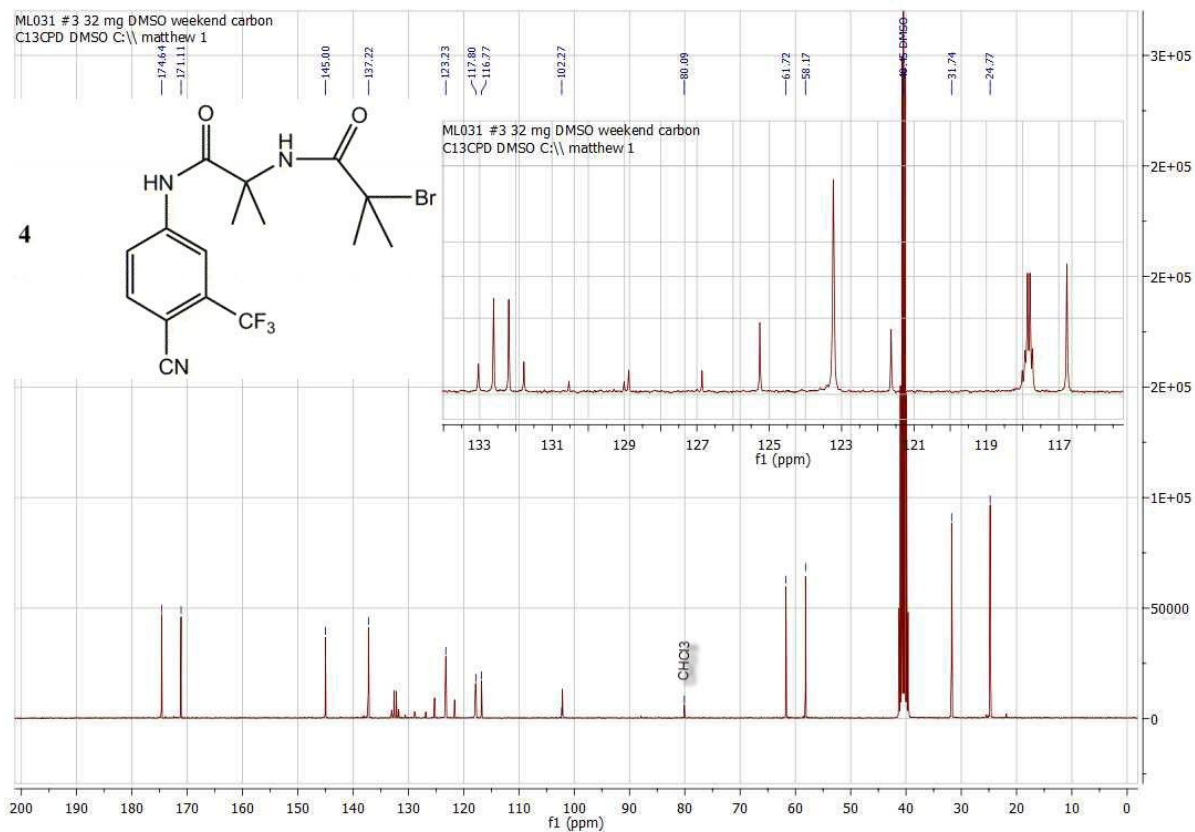

32 mg in 0.4 mL d6-DMSO, 75 MHz, 55000 scans



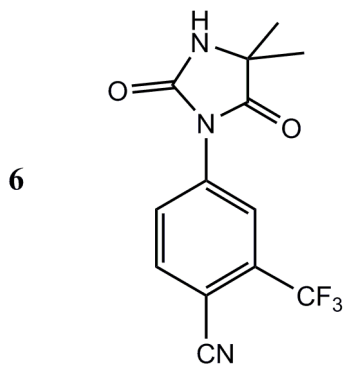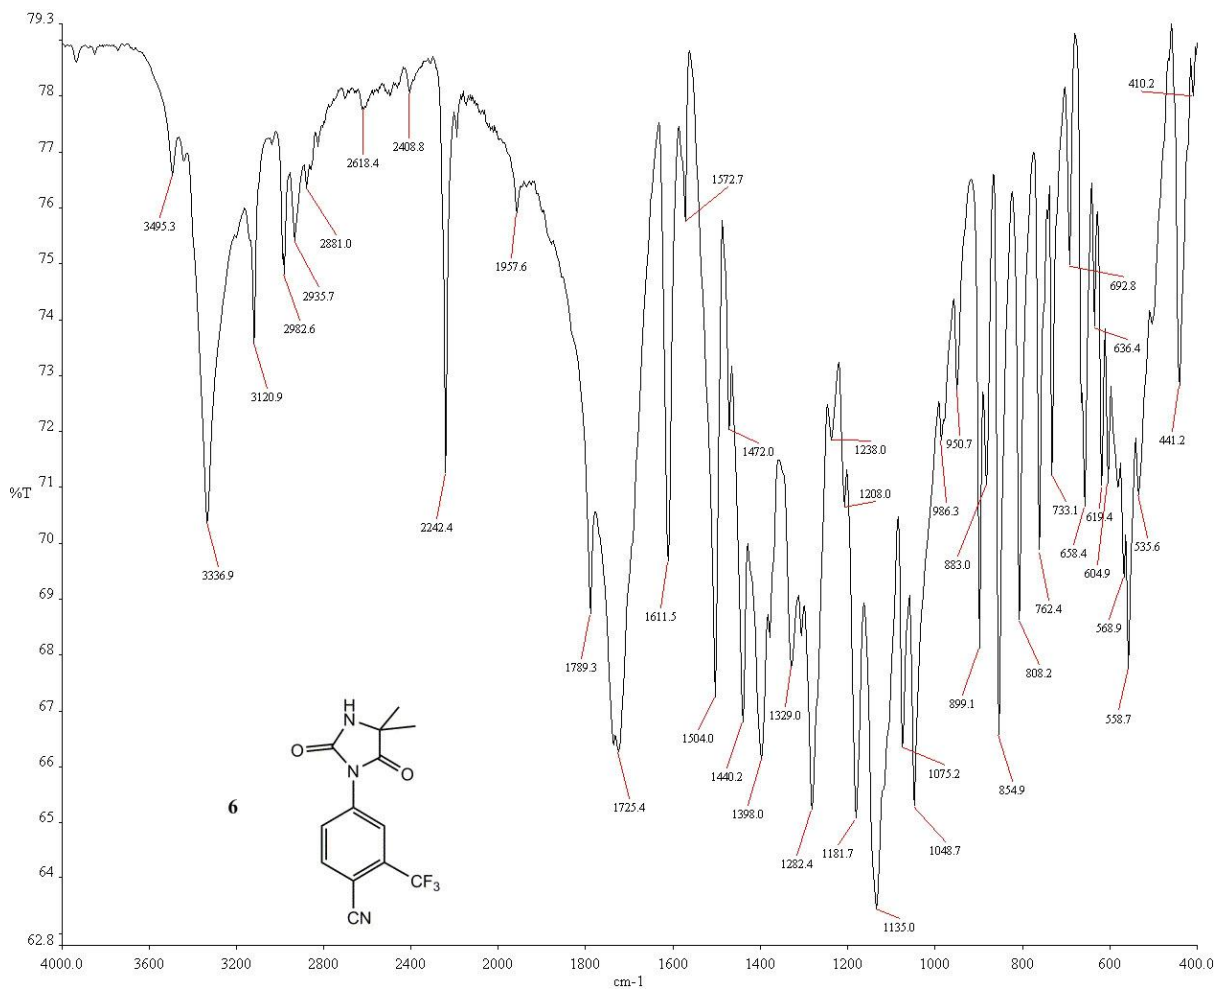

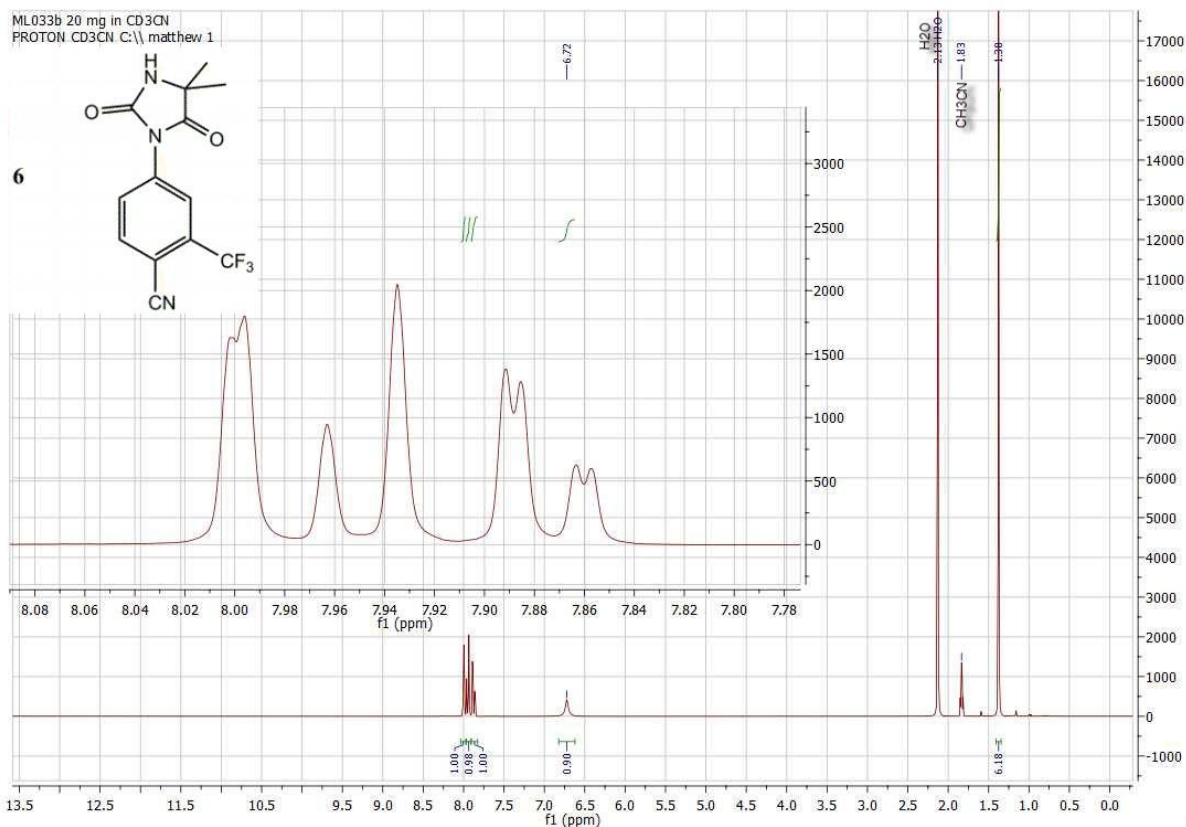

20 mg in 0.4 mL CD<sub>3</sub>CN, 300 MHz, 16 scans

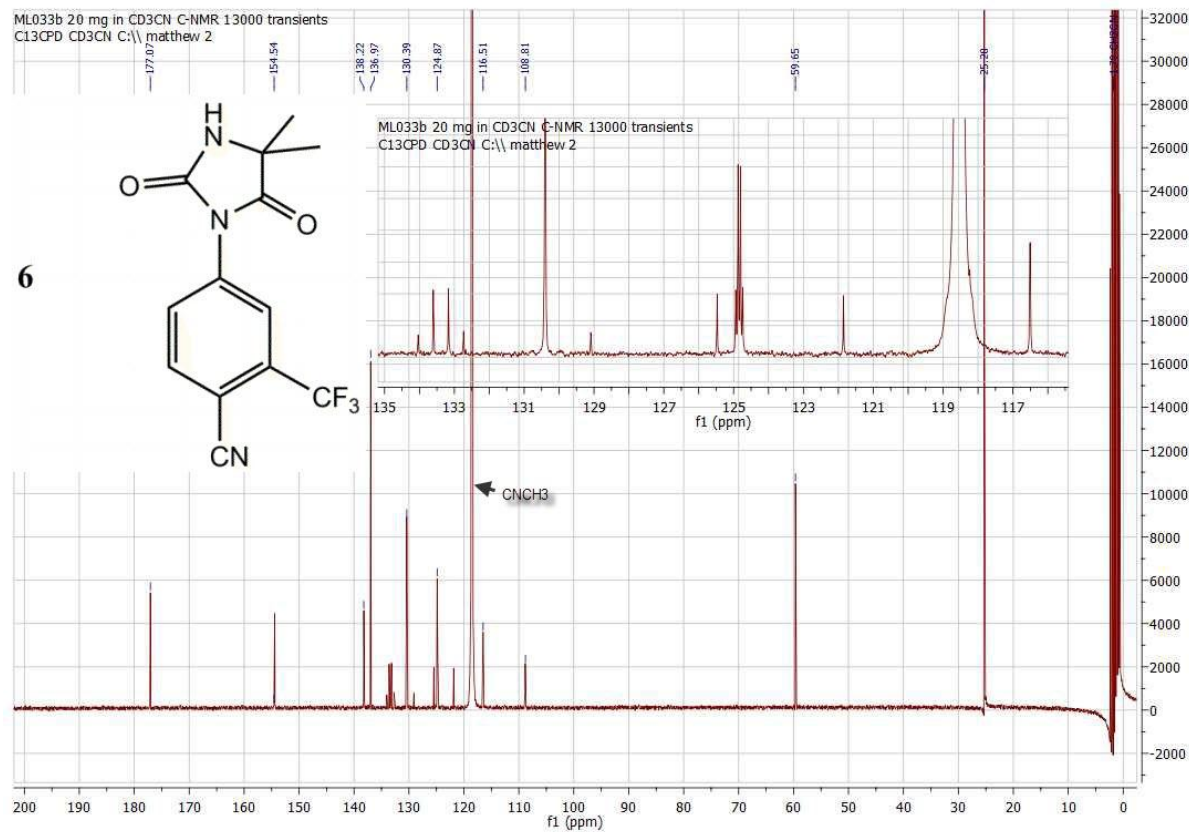

20 mg in 0.4 mL CD<sub>3</sub>CN, 75 MHz, 13000 scans

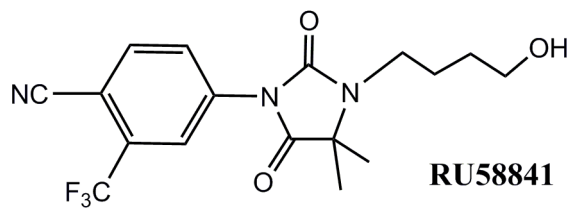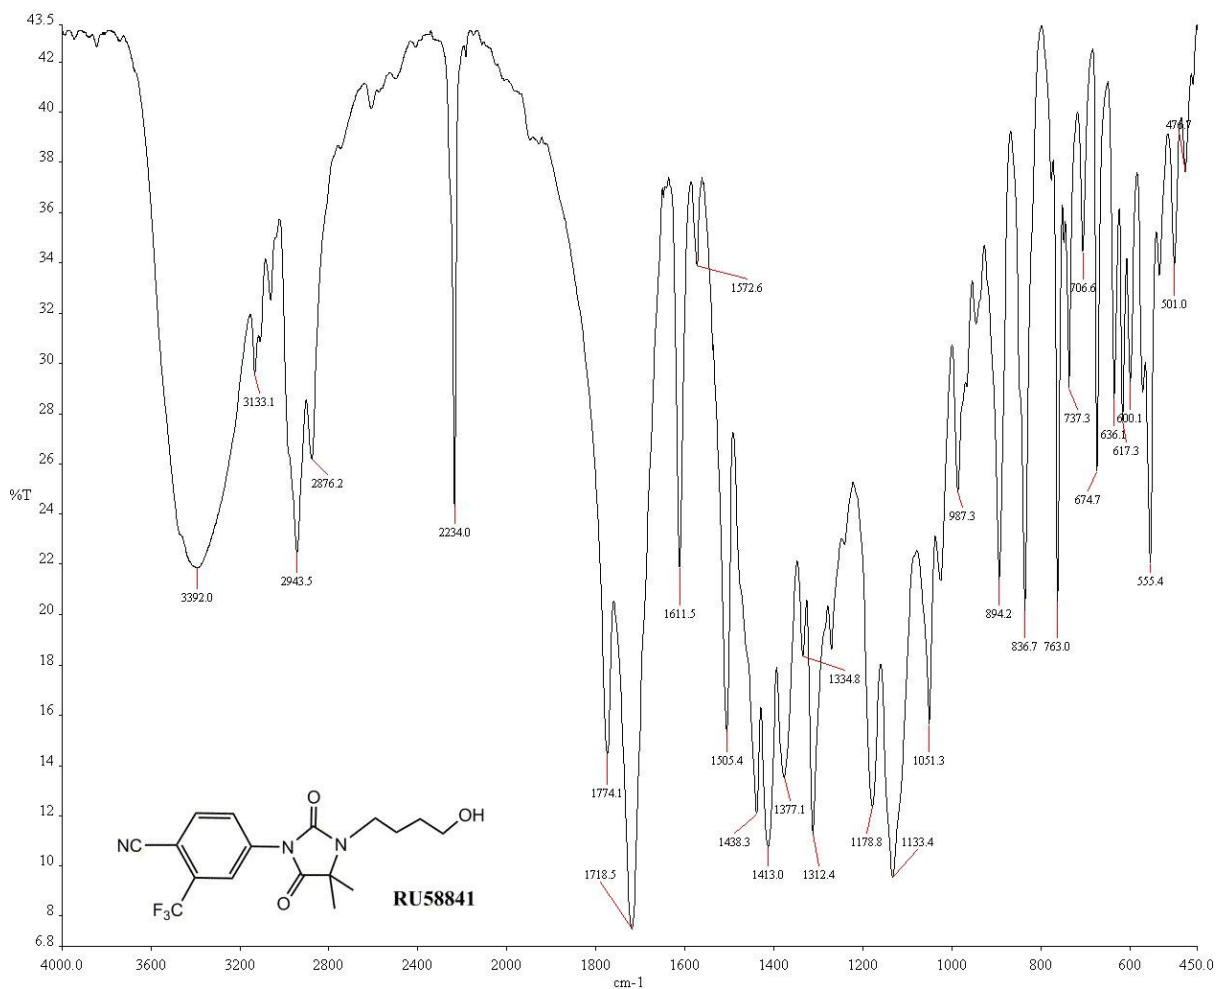

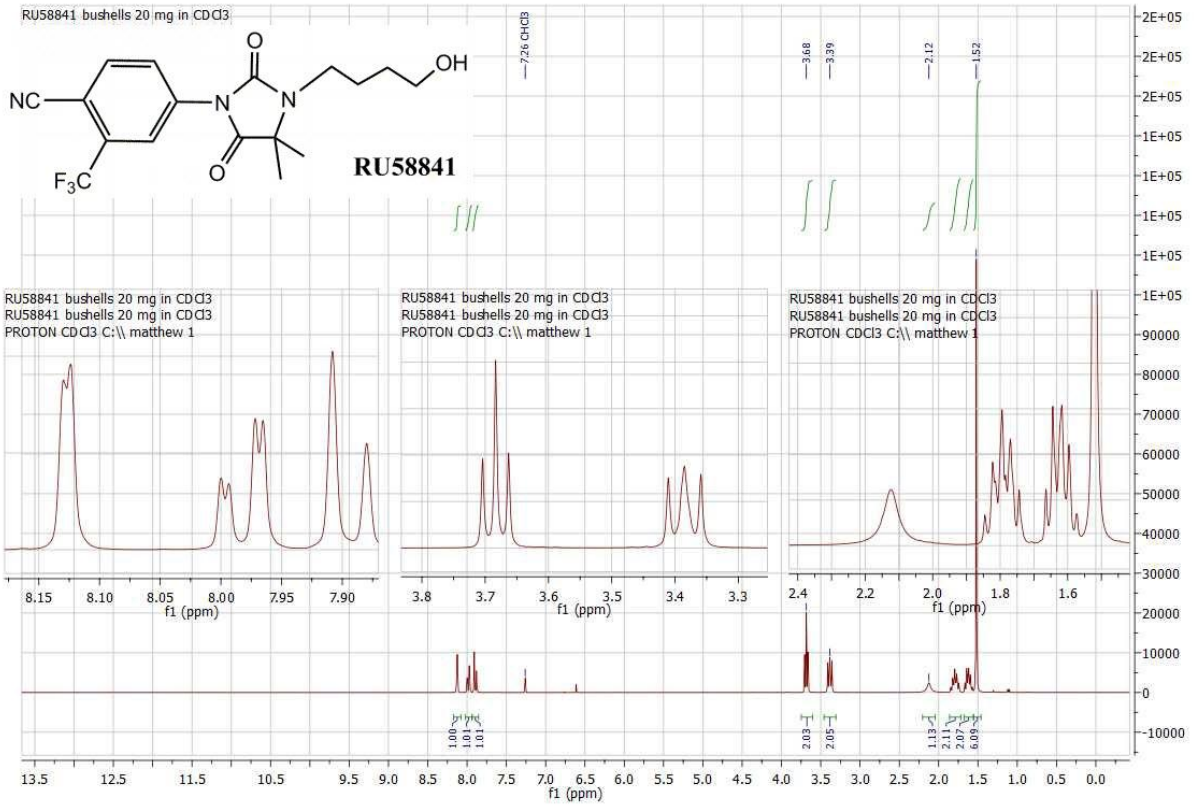

20 mg in 0.4 mL CDCl<sub>3</sub>, 300 MHz, 64 scans

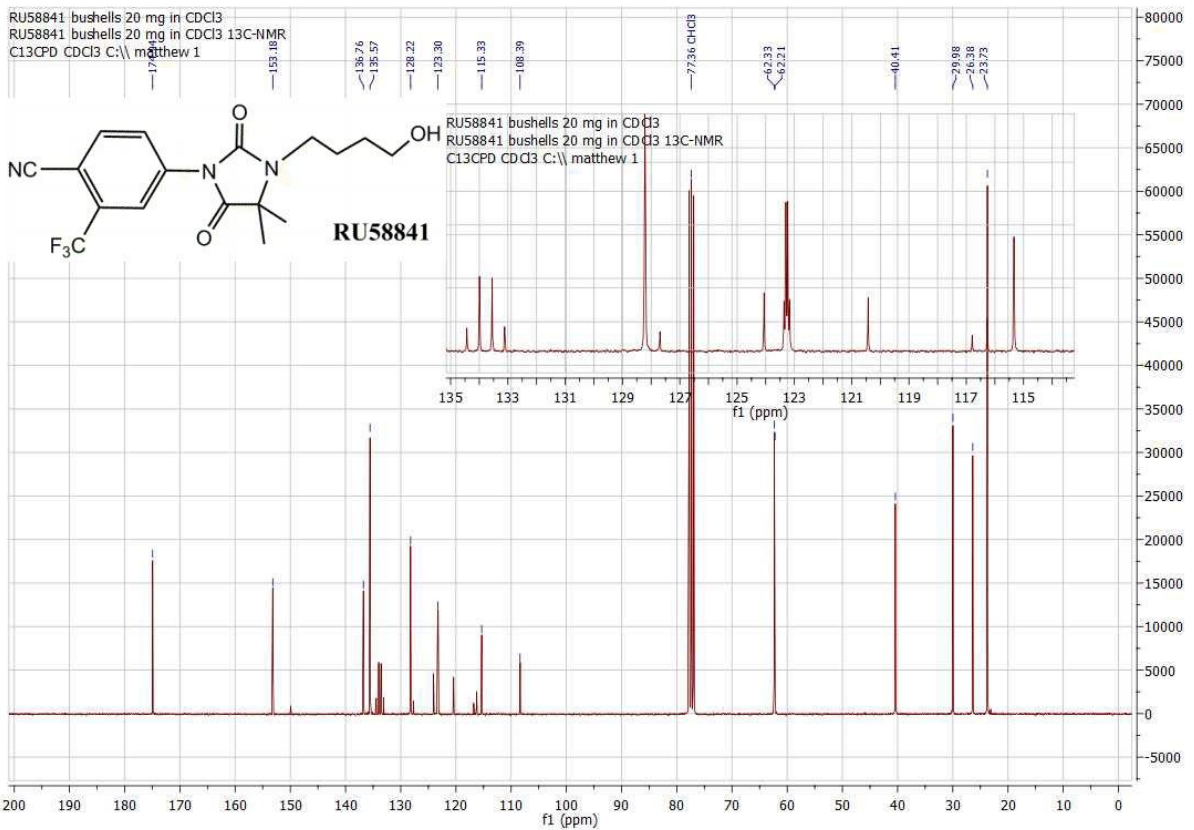

20 mg in 0.4 mL CDCl<sub>3</sub>, 75 MHz, 14262 scans
